# Supplementary material
Source: publisher figshare collection journal article supplement (https://karger.figshare.com/ndownloader/files/15033950)
Supplement: Supplementary file 1 [file 15033950]

**Supplementary Table 1: Quantitative real-time polymerase chain reaction primers**

| Gene Name                     | Primer sequence (F,R)    | Relevance                               | Efficiency | Product Length (base pairs) | Annealing Temp (°C) | Accession number |
|-------------------------------|--------------------------|-----------------------------------------|------------|-----------------------------|---------------------|------------------|
| <b>CCR5</b>                   | TGGTCAGAGGAGCTGAGACA     | Chemokine                               | 106%       | 86                          | 60                  | NM_001001618.1   |
|                               | AGAAGGGACTCGTCGTTTGA     |                                         |            |                             |                     |                  |
| <b>CLDN5</b>                  | CTCTGCTGGTTCGCCAACA      | Tight junction                          | 108%       | 75                          | 60                  | NM_001161636.1   |
|                               | CAGCTCGTACTTCTGCGACATG   |                                         |            |                             |                     |                  |
| <b>COX2 (PTGS2)</b>           | CCCAATTTGTTGAATCATTT     | Enzyme – inflammation related           | 86%        | 119                         | 56                  | NM_214321.1      |
|                               | TCTCATCTCTCTGCTCTGGT     |                                         |            |                             |                     |                  |
| <b>CXCL10</b>                 | CCCACATGTTGAGATCATTGC    | Chemokine                               | 89%        | 168                         | 55                  | NM_001008691.1   |
|                               | CATCCTTATCAGTAGTGCCG     |                                         |            |                             |                     |                  |
| <b>GAPDH</b>                  | CTTCACGACCATGGAGAAGG     | Reference gene                          | 90%        | 170                         | 60                  | XM_003361568.3   |
|                               | CCAAGCAGTTGGTGGTGCAG     |                                         |            |                             |                     |                  |
| <b>IL1<math>\beta</math></b>  | GGCCGCCAAGATATAACTGA     | Cytokine                                | 91%        | 70                          | 58                  | NM_214055.1      |
|                               | GGACCTCTGGGTATGGCTTTC    |                                         |            |                             |                     |                  |
| <b>IL6</b>                    | ATCAGGAGACCTGCTTGATG     | Cytokine                                | 109%       | 177                         | 60                  | NM_001252429.1   |
|                               | TGGTGGCTTTGTCTGGATTG     |                                         |            |                             |                     |                  |
| <b>IL8 (CXCL8)</b>            | GAAGAGAACTGAGAAGCAACAACA | Cytokine                                | 91%        | 99                          | 60                  | NM_213867.1      |
|                               | TTGTGTTGGCATCTTTACTGAGA  |                                         |            |                             |                     |                  |
| <b>MMP2</b>                   | CTGTGCAATACCTGAACACC     | Enzyme – extracellular matrix breakdown | 112%       | 85                          | 55                  | NM_214192.1      |
|                               | TGCATCTTCTTTAGTGTGTCC    |                                         |            |                             |                     |                  |
| <b>OCLN</b>                   | ATCAACAAAGGCAACTCT       | Tight junction                          | 112%       | 157                         | 55                  | NM_001163647.2   |
|                               | GCAGCAGCCATGTACTCT       |                                         |            |                             |                     |                  |
| <b>TGF<math>\beta</math></b>  | CGAGCCCTGGATACCAACT      | Cytokine                                | 97%        | 135                         | 60                  | NM_214015.2      |
|                               | GCAGAAATTGGCATGGTAG      |                                         |            |                             |                     |                  |
| <b>TNF<math>\alpha</math></b> | CCAATGGCAGAGTGGGTATG     | Cytokine                                | 87%        | 116                         | 55                  | NM_214022.1      |
|                               | TGAAGAGGACCTGGGAGTAG     |                                         |            |                             |                     |                  |
| <b>VEGFA</b>                  | CAACGACGAAGGTCTGGAGTG    | Angiogenesis                            | 95%        | 155                         | 55                  | NM_214084.1      |
|                               | GCCTCGCTCTATCTTTCTTTGG   |                                         |            |                             |                     |                  |
| <b>ZO1</b>                    | GAGGGCATTCCACGTTTC       | Tight junction                          | 85%        | 256                         | 55                  | XM_021098827.1   |
|                               | GCTTTAGAGCCGAGTCCTTG     |                                         |            |                             |                     |                  |

**Supplementary table 2: Correlations between immunoglobulin G extravasation into parietal cortex and hippocampus and measures of insult and injury. Significant correlations are shown in bold**

| Variable                         |       | IgG level Parietal Cortex | IgG level Hippocampus |
|----------------------------------|-------|---------------------------|-----------------------|
| Background pattern 1h PI         | $r_s$ | -0.601                    | -0.614                |
|                                  | $p$   | <b>0.004</b>              | <b>0.003</b>          |
| Background pattern 2h PI         | $r_s$ | -0.616                    | -0.629                |
|                                  | $p$   | <b>0.003</b>              | <b>0.002</b>          |
| Background pattern 4h PI         | $r_s$ | -0.778                    | -0.767                |
|                                  | $p$   | <b>0.000</b>              | <b>0.000</b>          |
| Background pattern 8h PI         | $r_s$ | -0.765                    | -0.708                |
|                                  | $p$   | <b>0.000</b>              | <b>0.000</b>          |
| Background pattern 12h PI        | $r_s$ | -0.775                    | -0.713                |
|                                  | $p$   | <b>0.000</b>              | <b>0.000</b>          |
| Background pattern 24h PI        | $r_s$ | -0.686                    | -0.522                |
|                                  | $p$   | <b>0.001</b>              | <b>0.015</b>          |
| Background pattern 36h PI        | $r_s$ | -0.465                    | -0.566                |
|                                  | $p$   | <b>0.034</b>              | <b>0.008</b>          |
| Background pattern 48h PI        | $r_s$ | -0.812                    | -0.784                |
|                                  | $p$   | <b>0.000</b>              | <b>0.000</b>          |
| Background pattern 72h PI        | $r_s$ | -0.770                    | -0.676                |
|                                  | $p$   | <b>0.000</b>              | <b>0.001</b>          |
| Histology score- Parietal cortex | $r_s$ | 0.768                     |                       |
|                                  | $p$   | <b>0.000</b>              |                       |
| Histology score – hippocampus    | $r_s$ |                           | 0.558                 |
|                                  | $p$   |                           | <b>0.007</b>          |
| Neurobehavioural score – 48h     | $r_s$ | -0.642                    | -0.587                |
|                                  | $p$   | <b>0.001</b>              | <b>0.002</b>          |
| Neurobehavioural score – 52h     | $r_s$ | -0.712                    | -0.638                |
|                                  | $p$   | <b>0.000</b>              | <b>0.001</b>          |
| Neurobehavioural score – 56h     | $r_s$ | -0.743                    | -0.602                |
|                                  | $p$   | <b>0.000</b>              | <b>0.003</b>          |
| Neurobehavioural score – 60h     | $r_s$ | -0.779                    | -0.718                |
|                                  | $p$   | <b>0.000</b>              | <b>0.000</b>          |
| Neurobehavioural score – 64h     | $r_s$ | -0.733                    | -0.713                |
|                                  | $p$   | <b>0.000</b>              | <b>0.000</b>          |
| Neurobehavioural score – 68h     | $r_s$ | -0.700                    | -0.716                |
|                                  | $p$   | <b>0.000</b>              | <b>0.000</b>          |
| Neurobehavioural score 72h       | $r_s$ | -0.686                    | -0.612                |
|                                  | $p$   | <b>0.000</b>              | <b>0.001</b>          |
| Length of hypoxia                | $r$   | -0.273                    | -0.216                |
|                                  | $p$   | 0.197                     | 0.31                  |
| Time hypotensive                 | $r$   | -0.028                    | -0.048                |
|                                  | $p$   | 0.898                     | 0.822                 |
| End pH                           | $r$   | -0.376                    | -0.510                |
|                                  | $p$   | 0.070                     | <b>0.011</b>          |
| End ABE                          | $r$   | -0.277                    | -0.378                |
|                                  | $p$   | 0.189                     | 0.068                 |
| Period LAEEG                     | $r$   | 0.280                     | 0.227                 |
|                                  | $p$   | 0.195                     | 0.298                 |
